# Supplementary material for: Comparison of eye tracking, electrooculography and an auditory brain-computer interface for binary communication: a case study with a participant in the locked-in state
Source: Springer Nature journal article supplement (doi:10.1186/s12984-015-0071-z), 2015-09-03

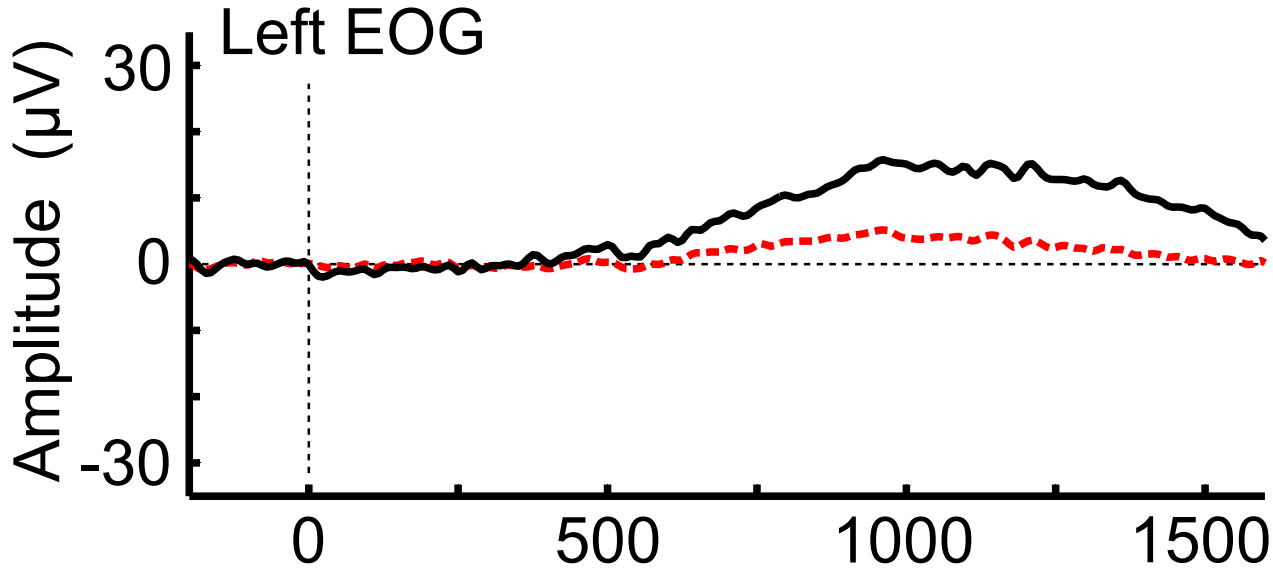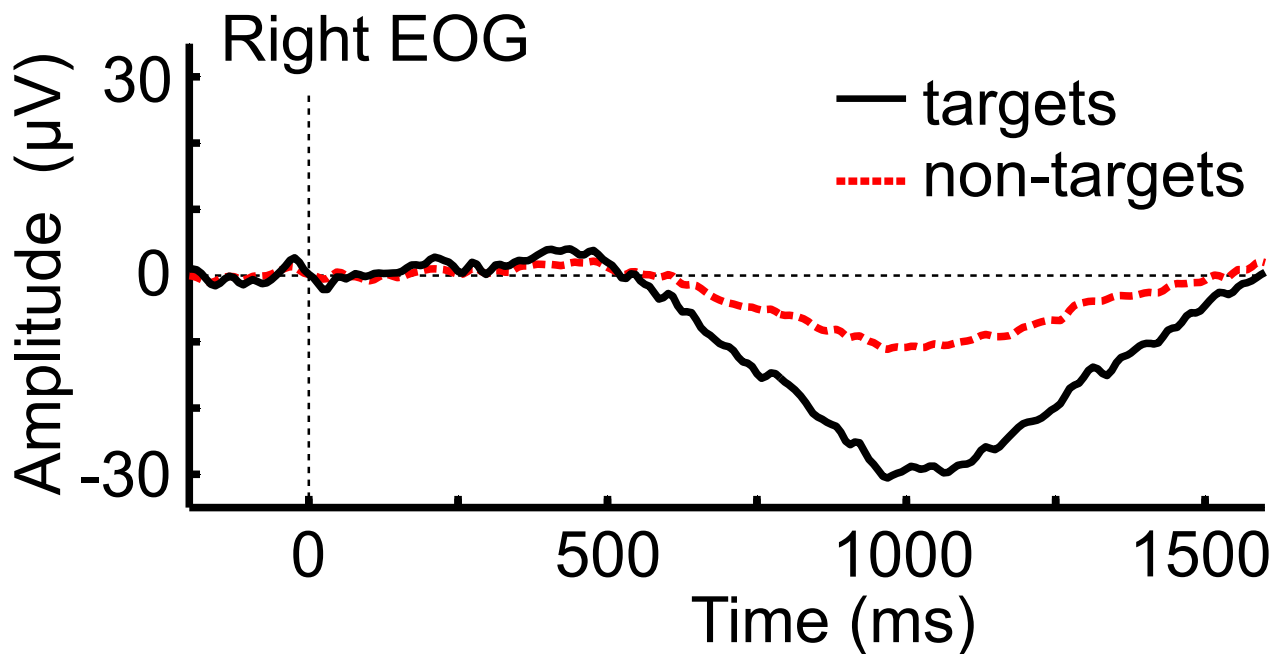

Supplement: MOESM1 [file 9769818]
